# Supplementary material for: Treatment outcomes among adults with HIV/non-communicable disease multimorbidity attending integrated care clubs in Cape Town, South Africa
Source: PubMed Central journal article supplement (PMC8515722; doi:10.1186/s12981-021-00387-3), 2021-10-14
Supplement: 12981_2021_387_MOESM1_ESM.pdf [file 12981_2021_387_MOESM1_ESM.pdf]

**Supplementary Table 1:** Pharmacotherapy for HTN among PLWH with comorbid HTN only compared to pharmacotherapy for HTN among PLWH with comorbid DM and HTN

| <b>Name of Anti-hypertensive</b> | <b>HTN only(N,%)</b> | <b>HTN and DM( N,%)</b> | <b>Total(N)</b> | <b>P-value</b> |
|----------------------------------|----------------------|-------------------------|-----------------|----------------|
| <i>As initial agent</i>          |                      |                         |                 |                |
| Furosemide                       | 2(0.9)               | 0(0)                    | 2               |                |
| Hydrochlorothiazide              | 175(79.2)            | 9(52.9)                 | 184             |                |
| Enalapril                        | 21(9.5)              | 3(17.7)                 | 24              |                |
| Amlodipine                       | 13(5.9)              | 3(17.7)                 | 16              |                |
| None                             | 10(4.5)              | 2(11.8)                 | 12              | 0.112          |
| <i>As additional agent</i>       |                      |                         |                 |                |
| Furosemide                       | 1(0.5)               | 0(0)                    | 1               |                |
| Hydrochlorothiazide              | 15(6.8)              | 1(6.3)                  | 16              |                |
| Enalapril                        | 94(42.5)             | 10(62.5)                | 104             |                |
| Amlodipine                       | 48(21.7)             | 2(12.5)                 | 50              |                |
| Atenol                           | 4(1.8)               | 1(6.3)                  | 5               |                |
| None                             | 59(26.7)             | 2(12.5)                 | 61              | 0.304          |
